# Supplementary material for: Generation of water–ionic liquid droplet pairs in soybean oil on microfluidic chip
Source: Royal Society of Chemistry journal article supplement (doi:10.1039/b918167a), 2009-11-18
Supplement: b918167a.pdf [file b918167a.pdf]

## Supplementary Material for

# Generation of Water-Ionic Liquid Droplet Pairs in Soybean Oil on Microfluidic Chip

Xuan Feng, Ying Yi, Xu Yu, Dai-Wen Pang, Zhi-Ling Zhang\*

Key Laboratory of Analytical Chemistry for Biology and Medicine (Ministry of Education), College of Chemistry and Molecular Sciences, Wuhan University, Wuhan 430072, P. R. China

### Supplementary Figure S1:

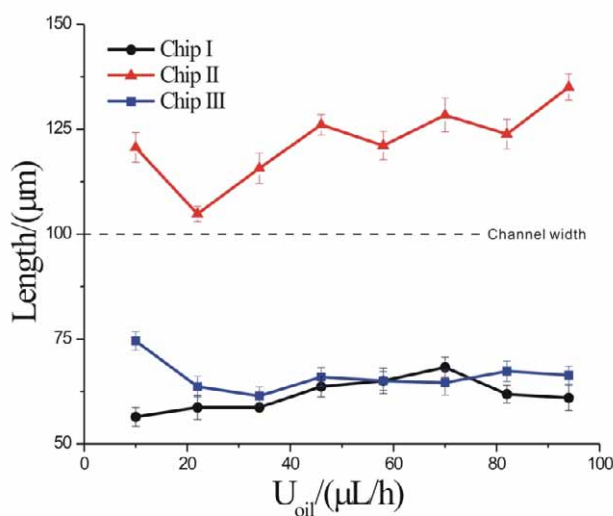

Fig.S1 The lengths of W/IL droplets in different kinds of chips. ( $U_{IL}=30\mu\text{L/h}$ ,  $U_W=30\mu\text{L/h}$ )

### Supplementary Movie 1

The movie shows formation of connected water-IL droplet pairs at the second flow-focusing region. The movie was recorded with a charge-coupled device (CCD, Retiga 2000R, Qimaging Corp, Canada) onto a microscope under 40x magnification (TE2000-U, Nikon Corp).

### Supplementary Movie 2

The movie shows formation of alternative water-IL droplet chain at the second flow-focusing region.

### Supplementary Movie 3

The movie shows formation of separated water-IL droplet pairs.
